# Supplementary material for: Immune diversity sheds light on missing variation in worldwide genetic diversity panels
Source: PubMed Central journal article supplement (PMC6203392; doi:10.1371/journal.pone.0206512), 2018-10-26
Supplement: pone.0206512.s001.pdf [file pone.0206512.s001.pdf]

| Code         | Super population  | # Samples (Performance Test) | # Samples (Total) |
|--------------|-------------------|------------------------------|-------------------|
| AFR          | African           | 182                          | 712               |
| AMR          | Ad Mixed American | 199                          | 373               |
| EAS          | East Asian        | 273                          | 536               |
| EUR          | European          | 338                          | 529               |
| SAS          | South Asian       | 0                            | 543               |
| <b>TOTAL</b> |                   | <b>992</b>                   | <b>2693</b>       |

| Code         | Population                                                        | Super population | # Samples (Performance Test) | # Samples (Total) |
|--------------|-------------------------------------------------------------------|------------------|------------------------------|-------------------|
| ACB          | African Caribbeans in Barbados                                    | AFR              | 0                            | 98                |
| ASW          | Americans of African Ancestry in SW USA                           | AFR              | 52                           | 68                |
| BEB          | Bengali from Bangladesh                                           | SAS              | 0                            | 103               |
| CDX          | Chinese Dai in Xishuangbanna, China                               | EAS              | 0                            | 108               |
| CEU          | Utah Residents (CEPH) with Northern and Western European Ancestry | EUR              | 53                           | 102               |
| CHB          | Han Chinese in Beijing, China                                     | EAS              | 86                           | 108               |
| CHS          | Southern Han Chinese                                              | EAS              | 97                           | 112               |
| CLM          | Colombians from Medellin, Colombia                                | AMR              | 70                           | 105               |
| ESN          | Esan in Nigeria                                                   | AFR              | 0                            | 111               |
| FIN          | Finnish in Finland                                                | EUR              | 100                          | 105               |
| GBR          | British in England and Scotland                                   | EUR              | 95                           | 102               |
| GIH          | Gujarati Indian from Houston, Texas                               | SAS              | 0                            | 109               |
| GWD          | Gambian in Western Divisions in the                               | AFR              | 0                            | 120               |
| IBS          | Iberian Population in Spain                                       | EUR              | 0                            | 108               |
| ITU          | Indian Telugu from the UK                                         | SAS              | 0                            | 112               |
| JPT          | Japanese in Tokyo, Japan                                          | EAS              | 90                           | 105               |
| KHV          | Kinh in Ho Chi Minh City, Vietnam                                 | EAS              | 0                            | 103               |
| LWK          | Luhya in Webuye, Kenya                                            | AFR              | 80                           | 106               |
| MSL          | Mende in Sierra Leone                                             | AFR              | 0                            | 98                |
| MXL          | Mexican Ancestry from Los Angeles USA                             | AMR              | 59                           | 70                |
| PEL          | Peruvians from Lima, Peru                                         | AMR              | 0                            | 91                |
| PJL          | Punjabi from Lahore, Pakistan                                     | SAS              | 0                            | 108               |
| PUR          | Puerto Ricans from Puerto Rico                                    | AMR              | 70                           | 107               |
| STU          | Sri Lankan Tamil from the UK                                      | SAS              | 0                            | 111               |
| TSI          | Toscani in Italia                                                 | EUR              | 90                           | 112               |
| YRI          | Yoruba in Ibadan, Nigeria                                         | AFR              | 50                           | 111               |
| <b>TOTAL</b> |                                                                   |                  | <b>992</b>                   | <b>2693</b>       |
