# Supplementary material for: Immune diversity sheds light on missing variation in worldwide genetic diversity panels
Source: PubMed Central journal article supplement (PMC6203392; doi:10.1371/journal.pone.0206512), 2018-10-26
Supplement: pone.0206512.s002.pdf [file pone.0206512.s002.pdf]

|                     |              | Locus |       |       |          |          | TOTAL | Percent       |
|---------------------|--------------|-------|-------|-------|----------|----------|-------|---------------|
|                     |              | HLA-A | HLA-B | HLA-C | HLA-DRB1 | HLA-DQB1 |       |               |
| Before verification | Concordant   | 1,938 | 1,944 | 1,953 | 1,946    | 1,359    | 9,140 | 97.9          |
|                     | Imprecise    | 27    | 16    | 10    | 1        | 1        | 55    | 0.6           |
|                     | Discordant   | 19    | 24    | 21    | 37       | 36       | 137   | 1.5           |
| After verification  | Correct      | 1,952 | 1,954 | 1,974 | 1,975    | 1,394    | 9,249 | <b>99.1</b>   |
|                     | Imprecise    | 27    | 15    | 8     | 1        | -        | 51    | <b>0.5</b>    |
|                     | Erroneous    | 5     | 15    | 2     | 8        | 2        | 32    | <b>0.3</b>    |
|                     | <b>Total</b> | 1,984 | 1,984 | 1,984 | 1,984    | 1,396    | 9,332 | <b>100.00</b> |
