# Supplementary material for: Immune diversity sheds light on missing variation in worldwide genetic diversity panels
Source: PubMed Central journal article supplement (PMC6203392; doi:10.1371/journal.pone.0206512), 2018-10-26
Supplement: pone.0206512.s003.pdf [file pone.0206512.s003.pdf]

| Locus    | PolyPheMe Result | Existing Result            | Valid Result | Nb of cases | Comment                                                                |                    |
|----------|------------------|----------------------------|--------------|-------------|------------------------------------------------------------------------|--------------------|
| HLA-A    | 02:07*           | 02:01*                     | 02:07*       | 9           | One case confirmed by targeted NGS and all cases confirmed manually    |                    |
|          | 26:02*           | 26:01*                     | 26:02*       | 2           | Confirmed Manually                                                     |                    |
|          | 11:02*           | 11:01*                     | 11:02*       | 1           | Confirmed Manually                                                     |                    |
|          | 66:03*           | 66:02*                     | 66:03*       | 1           | Confirmed Manually                                                     |                    |
| HLA-B    | 27:05*           | 27:03/51/52/09             | 27:05*       | 3           | Confirmed Manually                                                     |                    |
|          | 15:220*          | 15:03/103                  | 15:220*      | 2           | Confirmed Manually                                                     |                    |
|          | 40:02*           | Homozygous 40:01           | 40:02*       | 2           | Confirmed Manually                                                     |                    |
|          | 35:03*           | Homozygous 40:01           | 35:03*       | 1           | Confirmed by targeted NGS and manually                                 |                    |
|          | 07:06*           | 07:05*                     | 07:06*       | 1           | Confirmed Manually                                                     |                    |
|          | 51:01*           | Homozygous 15:01           | 51:01*       | 1           | Confirmed Manually                                                     |                    |
|          | 39:24*           | 39:03                      | 39:24*       | 1           | Confirmed Manually                                                     |                    |
| HLA-C    | 02:10*           | 02:02                      | 02:10*       | 5           | One case confirmed by targeted NGS and all cases confirmed manually    |                    |
|          | 07:18*           | 07:01                      | 07:18*       | 4           | Three cases confirmed by targeted NGS and all cases confirmed manually |                    |
|          | 08:03*           | 08:01                      | 08:03*       | 2           | Confirmed Manually                                                     |                    |
|          | 08:22*           | Homozygous 08:01           | 08:22*       | 2           | Confirmed Manually                                                     |                    |
|          | 18:02*           | 18:01                      | 18:02*       | 2           | Three cases confirmed by targeted NGS and all cases confirmed manually |                    |
|          | 01:03*           | 01:02                      | 01:03*       | 1           | Confirmed by targeted NGS and manually                                 |                    |
|          | 04:01*           | Homozygous 03:04           | 04:01*       | 1           | Confirmed by targeted NGS and manually                                 |                    |
|          | 05:37*           | 05:01/03                   | 05:37*       | 1           | Confirmed by targeted NGS and manually                                 |                    |
|          | 06:06*           | 06:02                      | 06:06*       | 1           | Confirmed Manually                                                     |                    |
|          | 07:01*           | 07:02                      | 07:01*       | 1           | Confirmed by targeted NGS and manually                                 |                    |
|          | 15:13*           | 15:02                      | 15:13*       | 1           | Confirmed Manually                                                     |                    |
|          | HLA-DQB1         | 02:02*                     | 02:01        | 02:02*      | 24                                                                     | Confirmed Manually |
|          |                  | 06:09*                     | 06:05        | 06:09*      | 5                                                                      | Confirmed Manually |
| 03:19*   |                  | 03:01                      | 03:19*       | 4           | Confirmed Manually                                                     |                    |
| 03:191*  |                  | 03:01:01/04/09/19/21/22/24 | 03:191*      | 1           | Confirmed Manually                                                     |                    |
| 06:39*   |                  | 06:04/34                   | 06:39*       | 1           | Confirmed Manually                                                     |                    |
| HLA-DRB1 | 14:54*           | 14:01                      | 14:54*       | 11          | Confirmed Manually                                                     |                    |
|          | 04:92*           | 04:07:01                   | 04:92*       | 5           | Confirmed Manually                                                     |                    |
|          | 08:03*           | 08:01/12                   | 08:03*       | 3           | Confirmed Manually                                                     |                    |
|          | 14:05*           | 14:01                      | 14:05*       | 2           | Confirmed Manually                                                     |                    |
|          | 01:23*           | 01:02                      | 01:23*       | 1           | Confirmed Manually                                                     |                    |
|          | 08:02*           | Homozygous 04:05           | 08:02*       | 1           | Confirmed Manually                                                     |                    |
|          | 11:01*           | 11:04                      | 11:01*       | 1           | Confirmed Manually                                                     |                    |
|          | 12:01*           | Homozygous 13:01           | 12:01*       | 1           | Confirmed Manually                                                     |                    |
|          | 12:02*           | 12:01                      | 12:02*       | 1           | Confirmed Manually                                                     |                    |
|          | 14:07*           | 14:44                      | 14:07*       | 1           | Confirmed Manually                                                     |                    |
|          | 13:02*           | 13:01                      | 13:02*       | 1           | Confirmed Manually                                                     |                    |
|          | 13:177*          | 13:35                      | 13:177*      | 1           | Confirmed Manually                                                     |                    |
