# Supplementary material for: Immune diversity sheds light on missing variation in worldwide genetic diversity panels
Source: PubMed Central journal article supplement (PMC6203392; doi:10.1371/journal.pone.0206512), 2018-10-26
Supplement: pone.0206512.s004.pdf [file pone.0206512.s004.pdf]

| Locus        | # types       | Precise types | Imprecise types | No result |
|--------------|---------------|---------------|-----------------|-----------|
| HLA-A        | 5,386         | 5,346         | 44              | 4         |
| HLA-B        | 5,386         | 5,377         | 25              | 16        |
| HLA-C        | 5,386         | 5,372         | 18              | 4         |
| HLA-DQB1     | 4,798         | 4,760         | 41              | 3         |
| HLA-DRB1     | 5,386         | 5,387         | 4               | 5         |
| <b>TOTAL</b> | <b>26,342</b> | <b>26,178</b> | <b>132</b>      | <b>32</b> |
