# Supplementary material for: Immune diversity sheds light on missing variation in worldwide genetic diversity panels
Source: PubMed Central journal article supplement (PMC6203392; doi:10.1371/journal.pone.0206512), 2018-10-26
Supplement: pone.0206512.s006.pdf [file pone.0206512.s006.pdf]

|                                                                                   | # occurrences minimum |      |      |      |      |      |      |      |      |      |      |      |
|-----------------------------------------------------------------------------------|-----------------------|------|------|------|------|------|------|------|------|------|------|------|
|                                                                                   | 1                     | 2    | 3    | 4    | 5    | 6    | 7    | 8    | 9    | 10   | 100  | 1000 |
| 1. # HLA alleles (total)                                                          | 2935                  | 1993 | 1581 | 1354 | 1202 | 1105 | 1027 | 970  | 925  | 888  | 455  | 280  |
| 2. # HLA alleles (given in line 1 and also observed in the 1,000 Genomes Project) | 385                   | 376  | 364  | 359  | 354  | 351  | 349  | 348  | 348  | 345  | 313  | 260  |
| Ratio (# in line 2 divided by # in line 1)                                        | 0.13                  | 0.19 | 0.23 | 0.27 | 0.29 | 0.32 | 0.34 | 0.36 | 0.38 | 0.39 | 0.69 | 0.93 |
