# Supplementary material for: Immune diversity sheds light on missing variation in worldwide genetic diversity panels
Source: PubMed Central journal article supplement (PMC6203392; doi:10.1371/journal.pone.0206512), 2018-10-26
Supplement: pone.0206512.s007.pdf [file pone.0206512.s007.pdf]

| Haplotype                                         | Populations with frequency > 0.01                                                                          | # Observations |
|---------------------------------------------------|------------------------------------------------------------------------------------------------------------|----------------|
| A*01:01, B*57:01, C*06:02, DRB1*07:01, DQB1*03:03 | AINDI, SCSEAI                                                                                              | 50             |
| A*01:01, B*08:01, C*07:01, DRB1*03:01, DQB1*02:01 | AAFA, AFA, AISC, ALANAM, AMIND, CARHIS, CARIBI, CAU, EURCAU, HAWI, HIS, MENAFC, MSWHIS, NAM, SCAHIS, SCAMB | 49             |
| A*03:01, B*07:02, C*07:02, DRB1*15:01, DQB1*06:02 | AISC, ALANAM, AMIND, CARHIS, CAU, EURCAU, HIS, MENAFC, MSWHIS, NAM, SCAHIS                                 | 33             |
| A*29:02, B*44:03, C*16:01, DRB1*07:01, DQB1*02:01 | AISC, AMIND, CARHIS, CARIBI, CAU, EURCAU, HIS, MSWHIS, NAM, SCAHIS                                         | 30             |
| A*03:01, B*35:01, C*04:01, DRB1*01:01, DQB1*05:01 | CAU, EURCAU                                                                                                | 30             |
| A*33:03, B*58:01, C*03:02, DRB1*03:01, DQB1*02:01 | AINDI, API, FILII, KORI, NCHI, SCSEAI, VIET                                                                | 29             |
| A*11:01, B*15:02, C*08:01, DRB1*12:02, DQB1*03:01 | API, NCHI, VIET                                                                                            | 29             |
| A*33:03, B*44:03, C*07:01, DRB1*07:01, DQB1*02:01 | AINDI, API, KORI, SCSEAI, VIET                                                                             | 24             |
| A*02:07, B*46:01, C*01:02, DRB1*09:01, DQB1*03:03 | API, NCHI, VIET                                                                                            | 24             |
| A*26:01, B*08:01, C*07:02, DRB1*03:01, DQB1*02:01 | AINDI, SCSEAI                                                                                              | 23             |
| A*30:01, B*42:01, C*17:01, DRB1*03:02, DQB1*04:02 | AAFA, AFA, AFB, CARB, SCAMB                                                                                | 20             |
| A*24:02, B*52:01, C*12:02, DRB1*15:02, DQB1*06:01 | JAPI, KORI                                                                                                 | 20             |
| A*02:01, B*44:02, C*05:01, DRB1*04:01, DQB1*03:01 | AISC, ALANAM, AMIND, CAU, EURCAU, NAM                                                                      | 17             |
| A*01:01, B*37:01, C*06:02, DRB1*10:01, DQB1*05:01 | AINDI, SCSEAI                                                                                              | 17             |
| A*33:03, B*58:01, C*03:02, DRB1*13:02, DQB1*06:09 | KORI, NCHI, VIET                                                                                           | 14             |
| A*24:02, B*35:02, C*04:01, DRB1*11:04, DQB1*03:01 | MENAFC                                                                                                     | 14             |
| A*02:01, B*07:02, C*07:02, DRB1*15:01, DQB1*06:02 | AISC, ALANAM, AMIND, CAU, EURCAU, NAM                                                                      | 13             |
| A*29:01, B*07:05, C*15:05, DRB1*10:01, DQB1*05:01 | VIET                                                                                                       | 13             |
| A*30:01, B*13:02, C*06:02, DRB1*07:01, DQB1*02:01 | API, KORI, NCHI                                                                                            | 11             |
| A*33:03, B*44:03, C*14:03, DRB1*13:02, DQB1*06:04 | JAPI, KORI                                                                                                 | 9              |
| A*24:02, B*07:02, C*07:02, DRB1*01:01, DQB1*05:01 | JAPI, KORI                                                                                                 | 7              |
| A*24:02, B*54:01, C*01:02, DRB1*04:05, DQB1*04:01 | JAPI, KORI                                                                                                 | 7              |
| A*02:07, B*46:01, C*01:02, DRB1*08:03, DQB1*06:01 | JAPI, KORI                                                                                                 | 7              |
| A*24:02, B*39:06, C*07:02, DRB1*14:06, DQB1*03:01 | MSWHIS                                                                                                     | 5              |
| A*33:01, B*14:02, C*08:02, DRB1*01:02, DQB1*05:01 | MENAFC                                                                                                     | 4              |
| A*68:02, B*57:03, C*07:01, DRB1*03:02, DQB1*04:02 | CARHIS, CARIBI                                                                                             | 4              |
| A*11:01, B*46:01, C*01:02, DRB1*09:01, DQB1*03:03 | NCHI                                                                                                       | 4              |
| A*24:07, B*35:05, C*04:01, DRB1*12:02, DQB1*03:01 | FILII, HAWI, VIET                                                                                          | 3              |
| A*24:02, B*15:02, C*08:01, DRB1*12:02, DQB1*03:01 | VIET                                                                                                       | 3              |
| A*11:01, B*54:01, C*01:02, DRB1*04:05, DQB1*04:01 | JAPI                                                                                                       | 3              |
| A*11:01, B*15:01, C*04:01, DRB1*04:06, DQB1*03:02 | JAPI, KORI                                                                                                 | 3              |
| A*68:03, B*39:05, C*07:02, DRB1*04:07, DQB1*03:02 | MSWHIS                                                                                                     | 1              |
| A*11:01, B*13:01, C*03:04, DRB1*15:01, DQB1*06:01 | NCHI                                                                                                       | 1              |
| A*11:01, B*38:02, C*07:02, DRB1*15:02, DQB1*05:02 | FILII                                                                                                      | 1              |
| A*24:02, B*59:01, C*01:02, DRB1*04:05, DQB1*04:01 | JAPI                                                                                                       | 1              |
| A*24:02, B*38:02, C*07:02, DRB1*15:02, DQB1*05:02 | FILII                                                                                                      | 1              |
| A*24:02, B*40:01, C*04:01, DRB1*04:03, DQB1*03:02 | FILII, HAWI                                                                                                | 1              |
| A*02:01, B*40:01, C*03:04, DRB1*09:01, DQB1*03:03 | HAWI                                                                                                       | 0              |
| A*02:03, B*15:02, C*08:01, DRB1*12:02, DQB1*03:01 | VIET                                                                                                       | 0              |
| A*02:06, B*15:01, C*01:02, DRB1*14:02, DQB1*03:01 | ALANAM                                                                                                     | 0              |
| A*02:06, B*27:05, C*02:02, DRB1*14:02, DQB1*03:01 | ALANAM                                                                                                     | 0              |
| A*02:06, B*40:02, C*03:04, DRB1*14:02, DQB1*03:01 | ALANAM                                                                                                     | 0              |
| A*02:06, B*55:02, C*01:02, DRB1*12:01, DQB1*03:01 | HAWI                                                                                                       | 0              |
| A*11:01, B*15:35, C*07:02, DRB1*15:02, DQB1*05:02 | FILII                                                                                                      | 0              |
| A*11:01, B*48:01, C*08:01, DRB1*11:01, DQB1*03:01 | HAWI                                                                                                       | 0              |
| A*24:02, B*27:05, C*02:02, DRB1*14:02, DQB1*03:01 | ALANAM                                                                                                     | 0              |
| A*24:02, B*40:02, C*03:04, DRB1*04:01, DQB1*03:01 | ALANAM                                                                                                     | 0              |
| A*24:02, B*40:02, C*03:04, DRB1*14:01, DQB1*05:03 | ALANAM                                                                                                     | 0              |
| A*24:02, B*40:02, C*03:04, DRB1*14:02, DQB1*03:01 | ALANAM                                                                                                     | 0              |
| A*24:02, B*40:02, C*15:02, DRB1*04:05, DQB1*05:03 | FILII                                                                                                      | 0              |
| A*24:02, B*48:01, C*08:01, DRB1*08:03, DQB1*06:01 | HAWI                                                                                                       | 0              |
| A*24:02, B*48:01, C*08:01, DRB1*14:02, DQB1*03:01 | ALANAM                                                                                                     | 0              |
| A*24:02, B*48:01, C*08:06, DRB1*04:01, DQB1*03:01 | ALANAM                                                                                                     | 0              |
| A*24:03, B*51:06, C*12:04, DRB1*07:01, DQB1*03:03 | FILII                                                                                                      | 0              |
| A*34:01, B*15:21, C*04:03, DRB1*15:02, DQB1*05:02 | FILII                                                                                                      | 0              |
| A*34:01, B*38:02, C*07:02, DRB1*15:02, DQB1*05:02 | FILII                                                                                                      | 0              |
| A*34:01, B*40:02, C*15:02, DRB1*14:08, DQB1*05:03 | HAWI                                                                                                       | 0              |
| A*34:01, B*40:02, C*15:02, DRB1*15:02, DQB1*05:02 | FILII                                                                                                      | 0              |
