# Supplementary material for: Immune diversity sheds light on missing variation in worldwide genetic diversity panels
Source: PubMed Central journal article supplement (PMC6203392; doi:10.1371/journal.pone.0206512), 2018-10-26
Supplement: pone.0206512.s008.pdf [file pone.0206512.s008.pdf]

| <b>Code</b> | <b>Population</b>                      |
|-------------|----------------------------------------|
| AAFA        | African American                       |
| AFA         | African American                       |
| AFB         | African                                |
| AINDI       | South Asian Indian                     |
| AISC        | American Indian - South or Central Am. |
| ALANAM      | Alaska Native or Aleut                 |
| AMIND       | North American Indian                  |
| API         | Asian or Pacific Islander              |
| CARB        | Caribbean Black                        |
| CARHIS      | Caribbean Hispanic                     |
| CARIBI      | Caribbean Indian                       |
| CAU         | Caucasian                              |
| EURCAU      | European Caucasian                     |
| FILII       | Filipino API                           |
| HAWI        | Hawaiian or other Pacific Islander     |
| HIS         | Hispanic                               |
| JAPI        | Japanese                               |
| KORI        | Korean                                 |
| MENAF       | Middle Eastern or N. Coast of Africa   |
| MSWHIS      | Mexican or Chicano                     |
| NAM         | Native American                        |
| NCHI        | Chinese                                |
| SCAHIS      | Hispanic - South or Central American   |
| SCAMB       | Black - South or Central American      |
| SCSEAI      | Southeast Asian                        |
| VIET        | Vietnamese                             |
